# Supplementary material for: Longitudinal Study of Informed Consent in Innovative Therapy Research: Experience and Provisional Recommendations from a Multicenter Trial of Intracerebral Grafting
Source: PubMed Central journal article supplement (PMC4444138; doi:10.1371/journal.pone.0128209), 2015-05-26
Supplement: pone.0128209.s001.pdf [file pone.0128209.s001.pdf]

## Questionnaire about informed consent in HD: CQ-HD

### ***Procedure:***

**At M0:** Ask the patient to read the information and the consent forms. Answer any questions and provide, even if there are no questions, a brief synthesis of important points in the protocol, then complete the questionnaire with the patient. Correct errors of interpretation concerning the protocol and re-explain obscure points to the patient. Finally, propose to the patient to sign the information and consent forms.

**At M12:** Fill in the questionnaire with the patient, without recalling information about the protocol. Correct errors of interpretation about the protocol and re-explain obscure points to the patient.

**Patient:** .....

**Age:** .....

**Sex:**            M             F

**Profession:** .....

### **1. Have you ever participated in an experimental study:**

1.1. Yes.....

1.2. No.....

### **2. What do you think about the graft? Is it:**

2.1. An experiment.....

2.2. A proven treatment.....

2.3. A non-proven treatment.....

2.4. I don't know.....

### **3. What do you expect from the graft:**

3.1. A cure.....

3.2. An improvement.....

3.3. Stabilization.....

3.4. Nothing special.....

3.5. I don't know.....

### **4. How many surgery procedures are you scheduled for in the protocol (free answer):**

.....

### **5. Where do the cells come from:**

- 5.1. From human fetuses .....
- 5.2. From cell cultures .....
- 5.3. From animal fetuses .....
- 5.4. From stem cells .....
- 5.5. From another source .....
- 5.6. I don't know .....

**6. What consequences does the randomization have for you?**

- 6.1. To be excluded from the protocol .....
- 6.2. To be included in the group that will receive the graft early .....
- 6.3. To be included in the group that will receive the graft late .....
- 6.4. To determine which group you will belong to .....
- 6.5. I don't know .....

**7. What is the duration of your participation in the study?**

- 7.1. 1 year .....
- 7.2. 13 months .....
- 7.3. 32 months .....
- 7.4. 52 months .....
- 7.5. 72 months .....
- 7.6. I don't know .....

**8. At what moment will you know when the graft will occur for you:**

- 8.1. 12 months .....
- 8.2. 13 months .....
- 8.3. 24 months .....
- 8.4. 32 months .....
- 8.5. 52 months .....
- 8.6. I don't know .....

**9. If you belong to the group that will receive the graft later, what does this represent for you:**

- 9.1. A disaster .....
- 9.2. An annoyance .....
- 9.3. Nothing .....
- 9.4. A good thing .....
- 9.5. An intense joy .....
- 9.6. I don't know .....

**10. If you belong to the group that will receive the graft earlier, what does this represent for you:**

- 10.1. A disaster .....
- 10.2. An annoyance .....
- 10.3. Nothing .....
- 10.4. A good thing .....
- 10.5. An intense joy .....
- 10.6. I don't know .....

**11. What types of drugs are recommended in the study:**

- 11.1. None .....
- 11.2. Anticoagulants .....
- 11.3. Immunosuppressants .....
- 11.4. Neuroleptics .....
- 11.5. Antidepressants .....
- 11.6. I don't know .....

**12. Who can decide to interrupt the protocol:**

- 12.1. You .....
- 12.2. Your family .....
- 12.3. Your family doctor .....
- 12.4. The neurologist .....
- 12.5. The sponsor .....
- 12.6. Nobody .....
- 12.7. I don't know .....

**13. What are the risks of the graft:**

- 13.1. None .....
- 13.2. Brain hemorrhage .....
- 13.3. Bacterial infection .....
- 13.4. Viral infection .....
- 13.5. Hair growth .....
- 13.6. Inefficacy .....
- 13.7. Renal failure .....
- 13.8. Cardiac failure .....
- 13.9. Transplant rejection .....
- 13.10. I don't know .....

**14. Is it possible that your graft may be cancelled for medical reasons despite your pre-inclusion in the protocol?**

- 14.1. Yes .....
- 14.2. No .....

**15. In your opinion, the grafts:**

- 15.1. Can reconstruct a damaged network in the brain .....
- 15.2. Can prevent the disease .....

- 15.3. Have a durable effect .....
- 15.4. Are effective .....
- 15.5. Have a transient efficacy .....
- 15.6. Are not always effective .....

**16. Does your doctor neurologist and investigator know in advance which group you will belong to:**

- 16.1. Yes.....
- 16.2. No .....

**17. The surgery will be performed:**

- 17.1. Under general anesthesia .....
- 17.2. Under local anesthesia .....

**18. What are the constraints for you:**

- 18.1. You will not be able to participate in another study at the same time .....
- 18.2. Some drugs are contraindicated .....
- 18.3. You will not be allowed to go on holiday.....
- 18.4. You will have to come to the hospital at dates scheduled by the neurologist.....

**19. Is randomization a problem for you:**

- 19.1. Yes.....
- 19.2. No .....
- 19.3. Maybe .....
- 19.4. Probably.....
- 19.5. I don't know .....

**20. What types of exams will you have during the study:**

- 20.1. Blood tests .....
- 20.2. Neurological evaluation.....
- 20.3. Psychiatric evaluation.....
- 20.4. Psychometric evaluation.....
- 20.5. Video recordings .....
- 20.6. Abdominal ultrasonography .....
- 20.7. Brain imaging (MRI, PET scan).....
- 20.8. Neurophysiology .....
- 20.9. I don't know .....

**21. Who is allowed to consult the data gathered in the study:**

- 21.1. The sponsor .....
- 21.2. Your family doctor .....
- 21.3. Your hospital neurologist .....
- 21.4. You .....
- 21.5. Your proxy.....
- 21.6. Nobody .....
- 21.7. I don't know .....

**22. Do you think you have received all the necessary information about the protocol:**

- 22.1. Yes.....
- 22.2. No .....
- 22.3. Maybe.....
- 22.4. Probably .....
- 22.5. I don't know .....

**23. In order to really evaluate the effects of the intracerebral graft in your disease, do you think it is acceptable to propose a fake graft to some patients during fake surgery:**

- 23.1. Yes.....
- 23.2. No .....
- 23.3. Maybe.....
- 23.4. Probably .....
- 23.5. I don't know .....

**24. When you first heard about this protocol, were you told something like: « it is not obligatory » or « you can refuse »:**

- 24.1. Yes.....
- 24.2. No .....

➤ **If yes, was this information given:**

- 24.1.1. Orally .....
- 24.1.2. In writing.....
- 24.1.3. Both.....
- 24.1.4. I don't know .....

**25. I will read to you a list of persons and would like you to say those who counted the most in providing you with information about the protocol.**

|                                                            | Very important           | Quite important          | Not very important       | Not important            | NA                       |
|------------------------------------------------------------|--------------------------|--------------------------|--------------------------|--------------------------|--------------------------|
| 25.1. Other patients from the hospital with whom you spoke | <input type="checkbox"/> | <input type="checkbox"/> | <input type="checkbox"/> | <input type="checkbox"/> | <input type="checkbox"/> |
| 25.2. Your hospital physician                              | <input type="checkbox"/> | <input type="checkbox"/> | <input type="checkbox"/> | <input type="checkbox"/> | <input type="checkbox"/> |
| 25.3. Another doctor in the medical unit                   | <input type="checkbox"/> | <input type="checkbox"/> | <input type="checkbox"/> | <input type="checkbox"/> | <input type="checkbox"/> |

|                                              |                          |                          |                          |                          |                          |
|----------------------------------------------|--------------------------|--------------------------|--------------------------|--------------------------|--------------------------|
| 25.4. Nurses                                 | <input type="checkbox"/> | <input type="checkbox"/> | <input type="checkbox"/> | <input type="checkbox"/> | <input type="checkbox"/> |
| 25.5. Your family doctor                     | <input type="checkbox"/> | <input type="checkbox"/> | <input type="checkbox"/> | <input type="checkbox"/> | <input type="checkbox"/> |
| 25.6. Patients' associations                 | <input type="checkbox"/> | <input type="checkbox"/> | <input type="checkbox"/> | <input type="checkbox"/> | <input type="checkbox"/> |
| 25.7. Family members or relatives            | <input type="checkbox"/> | <input type="checkbox"/> | <input type="checkbox"/> | <input type="checkbox"/> | <input type="checkbox"/> |
| 25.8. Others (please specify):.....<br>..... | <input type="checkbox"/> | <input type="checkbox"/> | <input type="checkbox"/> | <input type="checkbox"/> | <input type="checkbox"/> |

**26. I will read three sentences to you, and would like you to tell me if, in your opinion, they are legally TRUE or FALSE.**

In a protocol, from the moment when you are included:

26.1. You have to finish

- 26.1.1. True.....
- 26.1.2. False.....
- 26.1.3. I don't know.....

26.2. You have the right to withdraw when you want

- 26.2.1. True.....
- 26.2.2. False.....
- 26.2.3. I don't know.....

26.3. It depends, you have to discuss it with the physician

- 26.3.1. True.....
- 26.3.2. False.....
- 26.3.3. I don't know.....

**27. I will read to you a series of statements that represent reasons for participating in a protocol. I would like you to tell me those which were the most important for you.**

|                                                                | Very important           | Quite important          | Not very important       | Not important            | NA                       |
|----------------------------------------------------------------|--------------------------|--------------------------|--------------------------|--------------------------|--------------------------|
| 27.1. Because I know other persons who did so                  | <input type="checkbox"/> | <input type="checkbox"/> | <input type="checkbox"/> | <input type="checkbox"/> | <input type="checkbox"/> |
| 27.2. To benefit from the best treatment                       | <input type="checkbox"/> | <input type="checkbox"/> | <input type="checkbox"/> | <input type="checkbox"/> | <input type="checkbox"/> |
| 27.3. Because it is a way of helping other persons             | <input type="checkbox"/> | <input type="checkbox"/> | <input type="checkbox"/> | <input type="checkbox"/> | <input type="checkbox"/> |
| 27.4. To benefit from more gentle care                         | <input type="checkbox"/> | <input type="checkbox"/> | <input type="checkbox"/> | <input type="checkbox"/> | <input type="checkbox"/> |
| 27.5. To benefit my children                                   | <input type="checkbox"/> | <input type="checkbox"/> | <input type="checkbox"/> | <input type="checkbox"/> | <input type="checkbox"/> |
| 27.6. For the advancement of research, of medicine             | <input type="checkbox"/> | <input type="checkbox"/> | <input type="checkbox"/> | <input type="checkbox"/> | <input type="checkbox"/> |
| 27.7. Because it is the only way to benefit from the treatment | <input type="checkbox"/> | <input type="checkbox"/> | <input type="checkbox"/> | <input type="checkbox"/> | <input type="checkbox"/> |

|                                                     |                          |                          |                          |                          |                          |
|-----------------------------------------------------|--------------------------|--------------------------|--------------------------|--------------------------|--------------------------|
| 27.8. Because it is interesting                     | <input type="checkbox"/> | <input type="checkbox"/> | <input type="checkbox"/> | <input type="checkbox"/> | <input type="checkbox"/> |
| 27.9. Because my physician thinks it is a good idea | <input type="checkbox"/> | <input type="checkbox"/> | <input type="checkbox"/> | <input type="checkbox"/> | <input type="checkbox"/> |
| 27.10. Because there is no alternative              | <input type="checkbox"/> | <input type="checkbox"/> | <input type="checkbox"/> | <input type="checkbox"/> | <input type="checkbox"/> |

**28. If you need to know something or to ask questions about the protocol, do you feel that getting additional information would be:**

- 28.1. Easy .....
- 28.2. Not very easy .....
- 28.3. Difficult .....

**29. I would like now to talk about the information you received and to hear from you how it happened and what you thought about it:**

- *For example, was the information you received, orally or in writing, (place a number in the corresponding gap) :*
  - **1 Sufficient (1point)**
  - **2 Insufficient (0 point)**
  - **3 I don't know (0 point)**

|                                                         | Orally | In Writing | NA |
|---------------------------------------------------------|--------|------------|----|
| 29.1. About the objectives of the trial                 |        |            |    |
| 29.2. About the risks                                   |        |            |    |
| 29.3. About the insurance                               |        |            |    |
| 29.4. About the duration of the trial                   |        |            |    |
| 29.5. About the practical details for your organization |        |            |    |
| 29.6. About what happens if you want to withdraw        |        |            |    |
| 29.7. About the agreement from the ethical committee    |        |            |    |
| 29.8. About medical research law                        |        |            |    |
| 29.9. About the respect of anonymity                    |        |            |    |

**Name of the investigator** .....

**SITE** : .....

**DATE** : .....
